# Supplementary material for: Outcomes in Randomized Clinical Trials Testing Changes in Daily Water Intake: A Systematic Review
Source: PubMed Central journal article supplement (PMC11589796; doi:10.1001/jamanetworkopen.2024.47621), 2024-11-25
Supplement: jamanetwopen-e2447621-s002.pdf [file jamanetwopen-e2447621-s002.pdf]

## Data Sharing Statement

Hakam. Outcomes in Randomized Clinical Trials Testing Changes in Daily Water Intake. *JAMA Netw Open*. Published November 25, 2024. doi:10.1001/jamanetworkopen.2024.47621

### Data

**Data available:** No

### Additional Information

**Explanation for why data not available:** All data used in this manuscript is published in the literature and thus already available. We made every effort to cite all sources of information.
